# Supplementary material
Source: publisher figshare collection journal article supplement (https://sage.figshare.com/ndownloader/files/22077855)
Supplement: Supplementary file 1 [file 22077855]

## Appendix 1: Superhero Workshop Lesson Plan

| Time (mins) | Supporting Materials                                                                                              | Instructor Actions                                                                                                                                                                                                                                                                                                                                                                                                                                                                                                                                                                                                                                                                                                                                                          | Intended Outcomes                                                                                                                                                                           |
|-------------|-------------------------------------------------------------------------------------------------------------------|-----------------------------------------------------------------------------------------------------------------------------------------------------------------------------------------------------------------------------------------------------------------------------------------------------------------------------------------------------------------------------------------------------------------------------------------------------------------------------------------------------------------------------------------------------------------------------------------------------------------------------------------------------------------------------------------------------------------------------------------------------------------------------|---------------------------------------------------------------------------------------------------------------------------------------------------------------------------------------------|
| 20          | Students should bring photographs of themselves of when they were approx. 5 years old and/ or supporting evidence | <p>Participants should work in small teams to explore what they were like as children. They are asked to reflect and share their experiences of being five years old.</p> <p>The following can be used as discussion points.<br/>When you were five years old:</p> <ol style="list-style-type: none"> <li>1. What creative activities did you engage in (e.g., role play, dressing in costumes, building hideouts, etc.)</li> <li>2. What were the limitations you enforced within these activities? (the answer is usually none or few)</li> <li>3. How has this changed as you have grown up? Why?</li> <li>4. Do you still make time to be creative? Discuss.</li> </ol> <p>Participants can also choose to illustrate this using the poster and materials provided.</p> | This time should be spent exploring and reflecting on a time when they lacked imaginary boundaries, limitations were few and they had the ability to see the world through a creative lens. |
| 30          | Costumes, masks, drawing materials, craft materials etc. are provided by the instructor.                          | <p>Remembering that creative imagination starts in childhood and based upon recollection of their childhood selves, students are asked to embody their own version of a superhero. This might include choosing a superhero mask or creating an icon using the materials provided. Students may also choose to draw or write a short paragraph about the real superhero in their lives.</p> <p>Throughout the activity, ‘superhero’ music should be played to create a fun and jovial atmosphere e.g. <a href="https://www.youtube.com/watch?v=9ZuWt7ZEFMQ">https://www.youtube.com/watch?v=9ZuWt7ZEFMQ</a></p> <p>Students should take and save pictures of themselves, and store the imagery or representative artifacts for future use in the class.</p>                  | The educators should help students to capture the feeling of creativity (and lack of limitations we experienced in our childhood) as they embody their superhero.                           |
| 10          |                                                                                                                   | <p>Brief Reflection</p> <p>(Further reflection after the 60min session is encouraged- see Appendix 2)</p>                                                                                                                                                                                                                                                                                                                                                                                                                                                                                                                                                                                                                                                                   | Participants are challenged to acknowledge the feelings associated with the exercise as reinforcement of these outcomes will be used later in the semester for problem solving.             |

## Appendix 2: Reflective Exercise

Educators are encouraged to adapt the reflective exercise to the needs of the participants. These questions can be used as a platform for discussion within the class or as an assignment for assessment purposes.

| Possible Reflective Questions                                                                                                         | Student Responses |
|---------------------------------------------------------------------------------------------------------------------------------------|-------------------|
| What feelings or emotions did you experience during the exercise?                                                                     |                   |
| How did the experience change your thinking about creativity?                                                                         |                   |
| What holds you back from being a creative problem solver?                                                                             |                   |
| How have your assumptions about your ability to be creative been challenged by the experience?                                        |                   |
| How could you harness these feelings/emotions in reminding yourself that once you were a very creative person who had no limitations? |                   |
| How might you use these feelings when faced with periods of uncertainty in our entrepreneurial endeavors?                             |                   |
| How might you use these feelings when faced with resource limitations?                                                                |                   |
| What did you learn about yourself from this experience?                                                                               |                   |
| What is your creative vision for this semester project/ for the next year, or five years?                                             |                   |

## Photographs

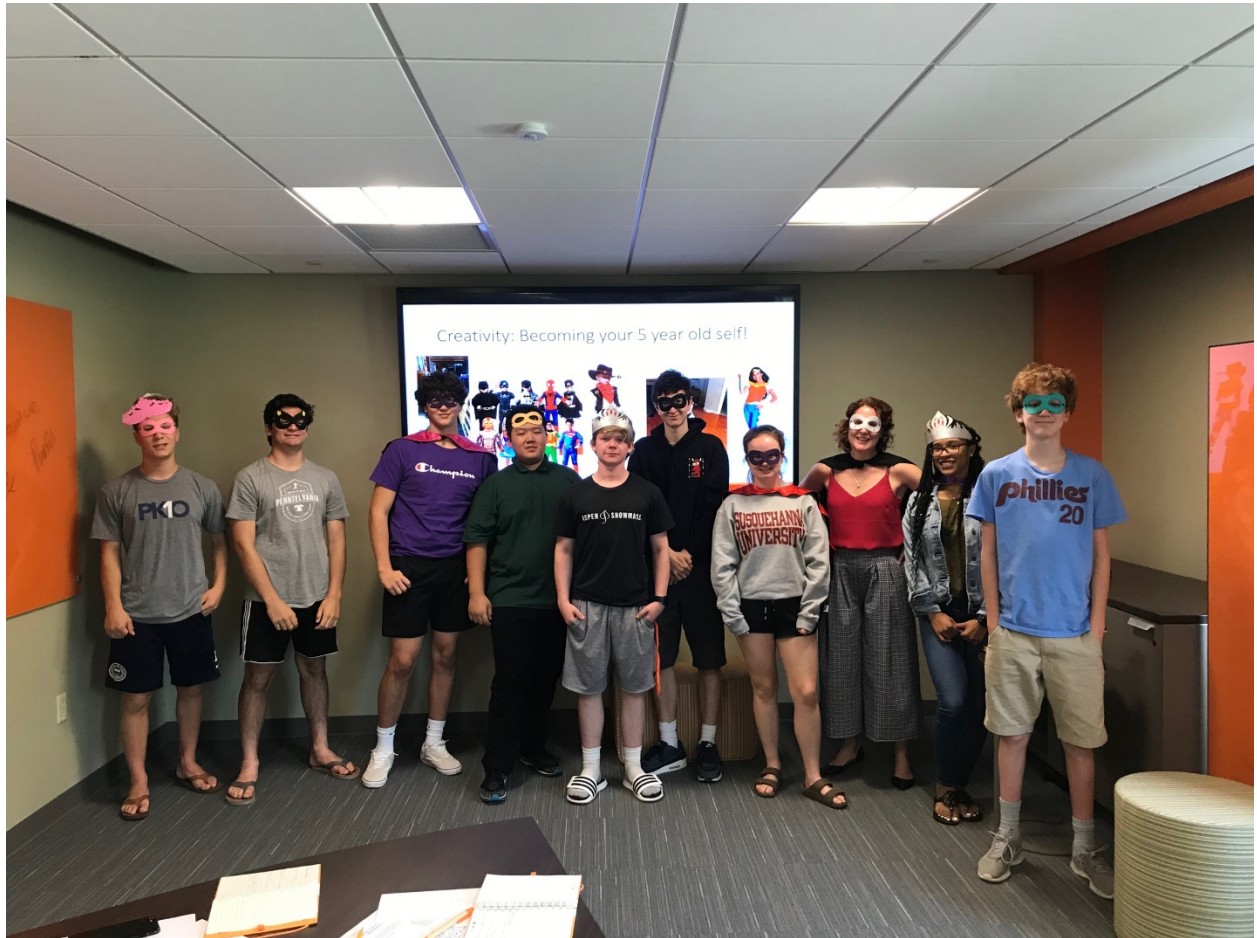

Photograph #1

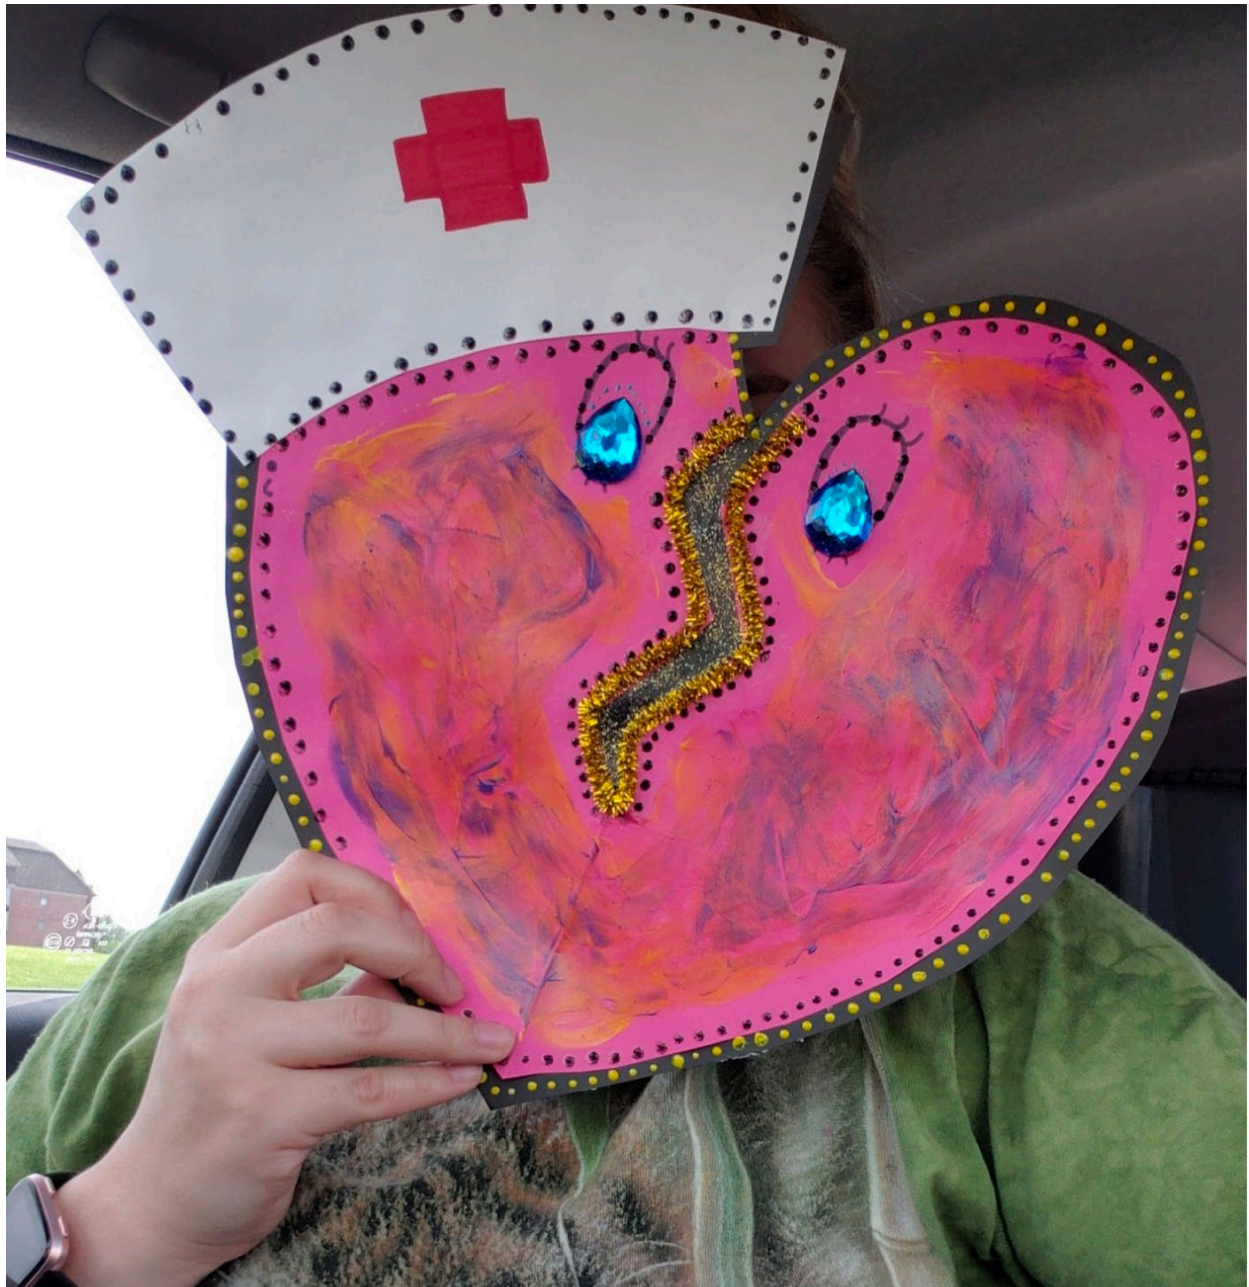

Photograph #2



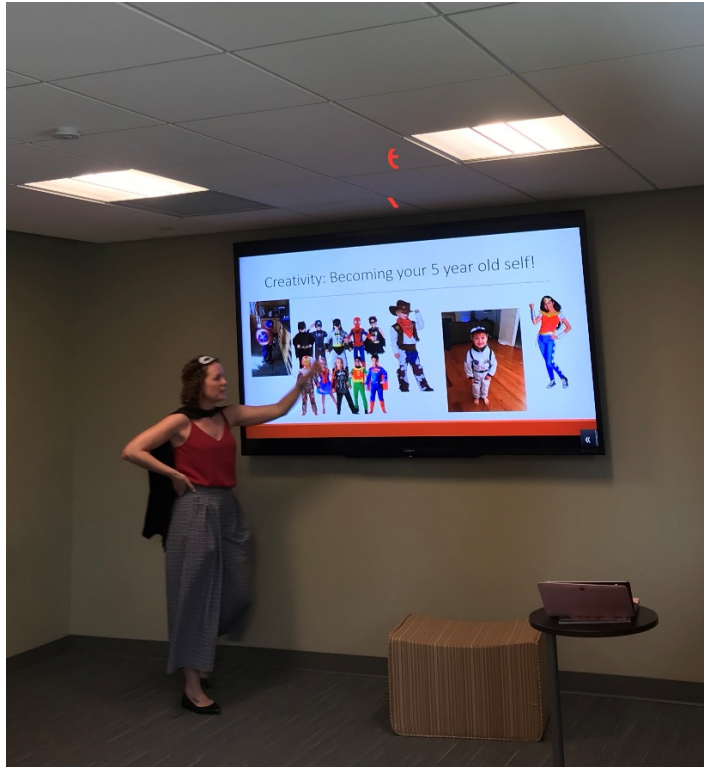

Photograph #3
